# Supplementary material for: A New Long Noncoding RNA ALB Regulates Autophagy by Enhancing the Transformation of LC3BI to LC3BII during Human Lens Development
Source: PubMed Central journal article supplement — Mol Ther Nucleic Acids. 2017 Oct 5;9:207–17. doi: 10.1016/j.omtn.2017.09.011 (PMC5650653; doi:10.1016/j.omtn.2017.09.011), 2017-10-05
Supplement: mmc1.pdf [file mmc1.pdf]

**OMTN, Volume 9**

**Supplemental Information**

**A New Long Noncoding RNA ALB Regulates  
Autophagy by Enhancing the Transformation of  
LC3BI to LC3BII during Human Lens Development**

**Qiuli Fu, Zhenwei Qin, Lifang Zhang, Danni Lyu, Qiaomei Tang, Houfa Yin, Zhijian Chen, and Ke Yao**

**Figure.S1**

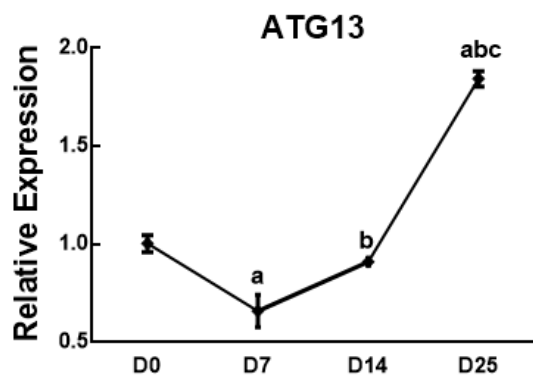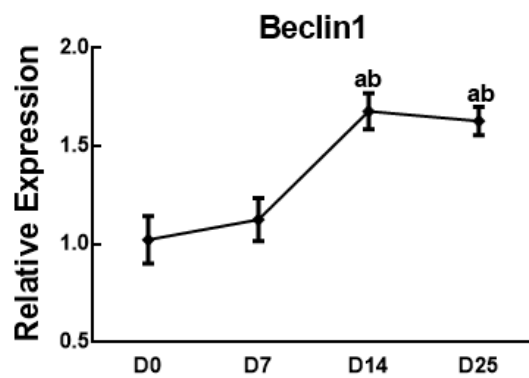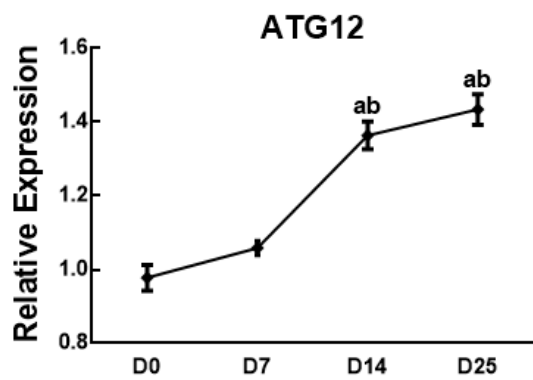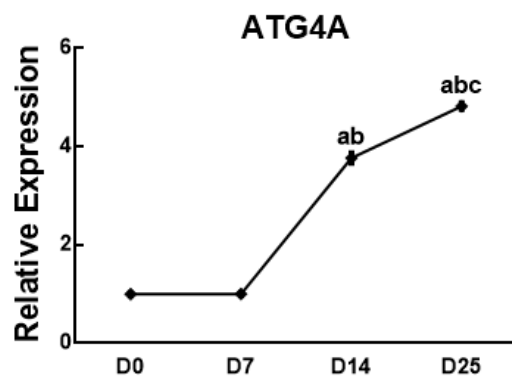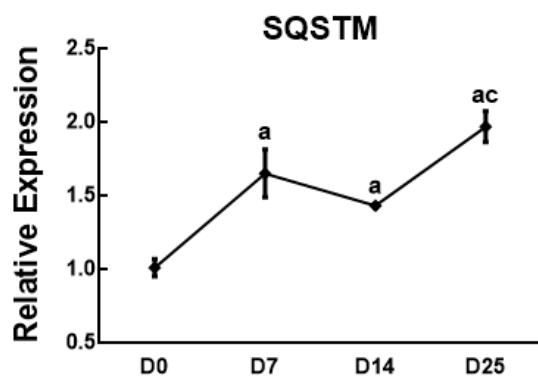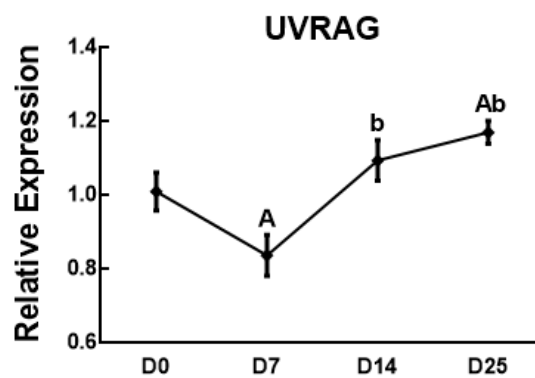

**Figure.S2**

**A**

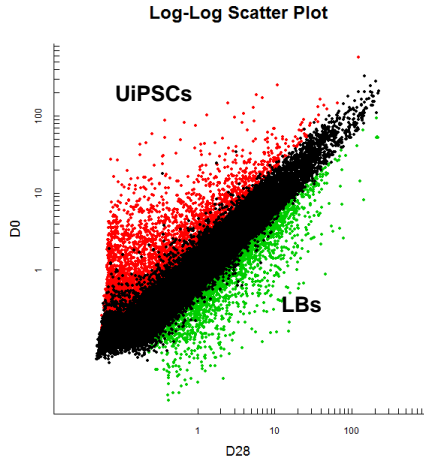

**B**

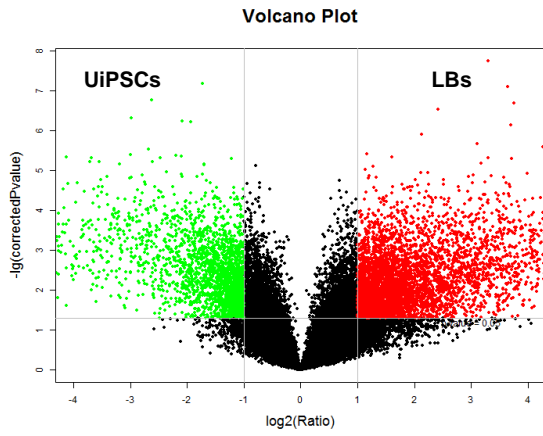

**C**

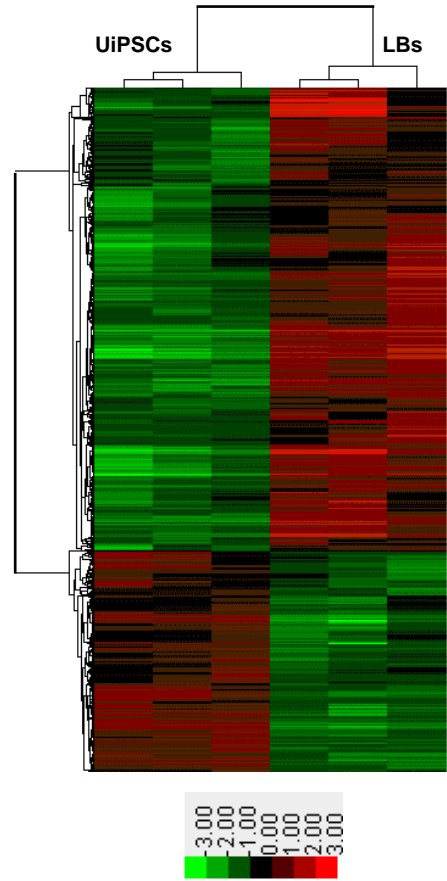

**Figure.S3**

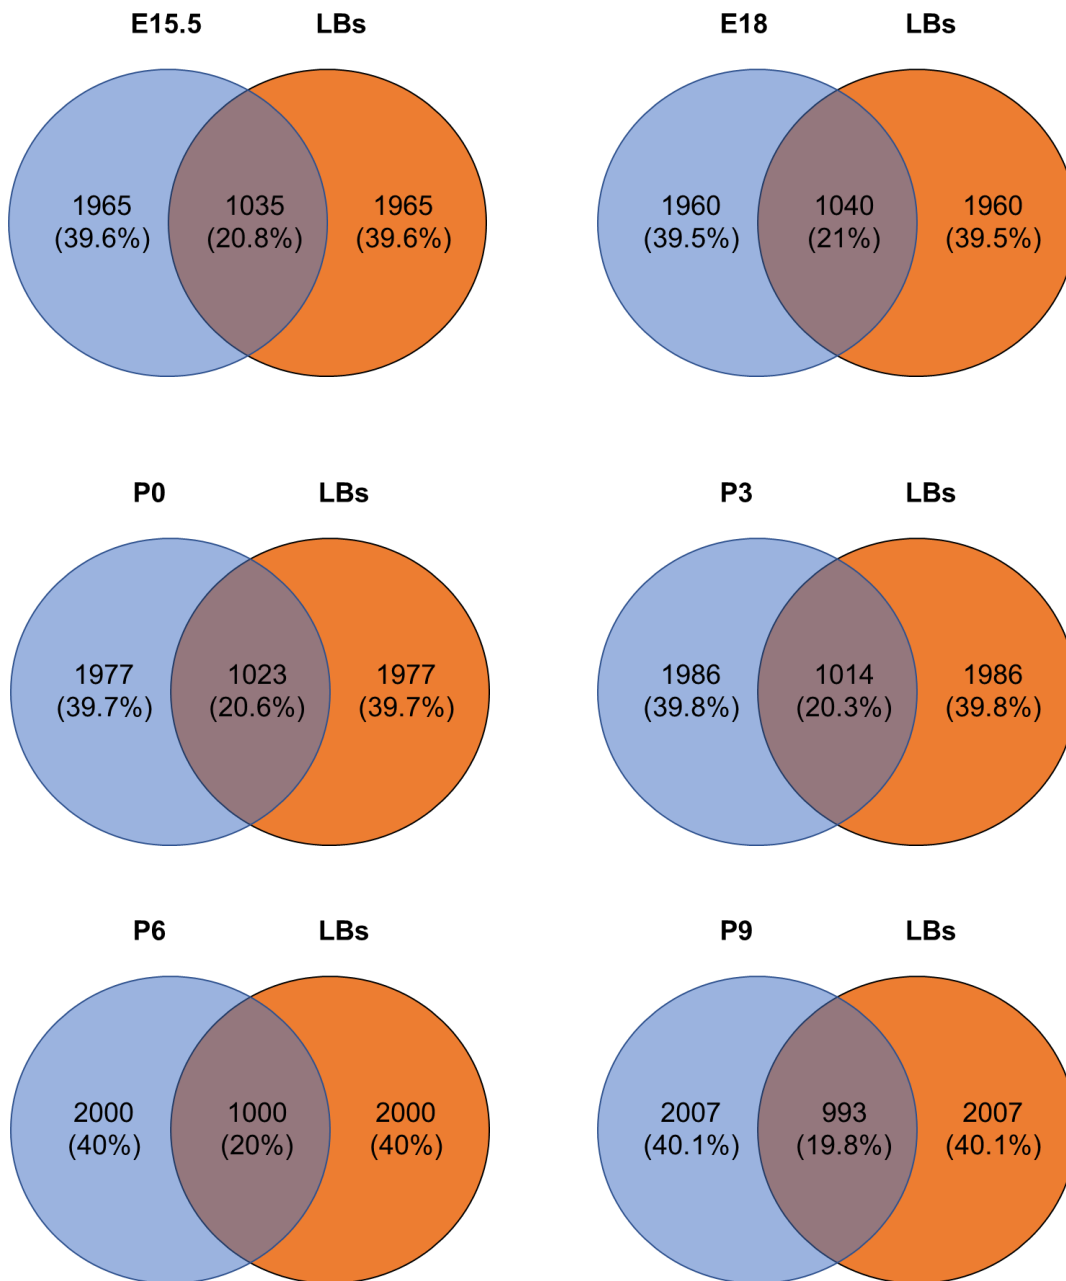

Figure.S4

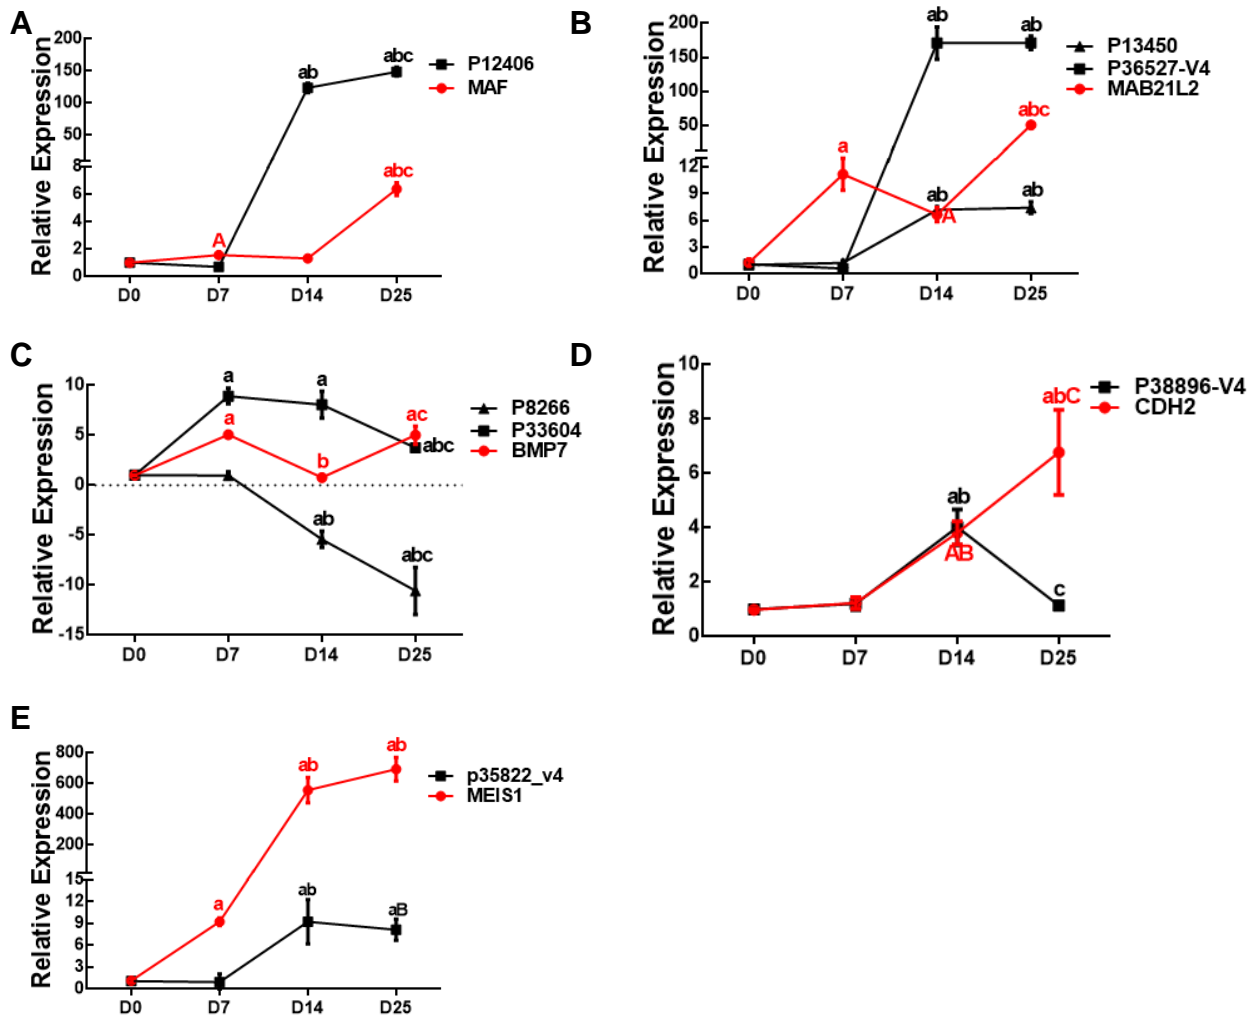

**Figure.S5**

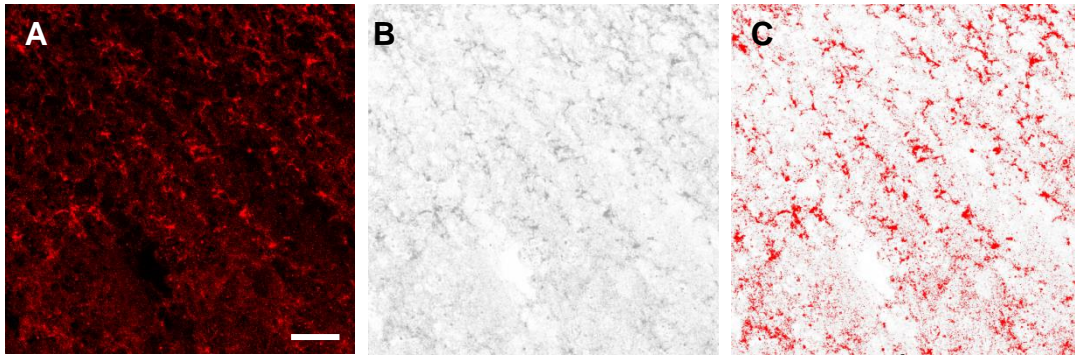

## **SUPPLEMENTAL FIGURE LEGENDS**

### **Figure. S1 Expression pattern of other autophagy associated genes during LB differentiation**

qRT-PCR analysis showed the increased expression of other autophagy associated genes during LB differentiation process including ATG13, Beclin1, ATG12, ATG4A, SQSTM and UVRAG. The bar represents mean  $\pm$  SEM (n=3 independent experiments). a =  $p < 0.01$  vs D0; A =  $p < 0.05$  vs D0; b =  $p < 0.01$  vs D7; c =  $p < 0.01$  vs D14.

### **Figure. S2 Differential expression of mRNA between LBs and UiPSCs.**

(A-B) Log-Log Scatter plot and Volcano plot show the differential expressed mRNAs between LBs and UiPSCs. (C) Heat map shows the different expression profiling of mRNAs between LBs and UiPSCs.

### **Figure. S3 Global bioinformatic comparison of the gene expression patterns between LBs and mouse embryonic and postnatal lens.**

Global bioinformatic comparison of top 3000 expressed genes identified

in LBs with that of mouse embryonic and postnatal lens published by others using second generation sequencing.

**Figure. S4 Expression pattern of lens development associated mRNAs and their corresponding lncRNAs during LB differentiation process.**

(A) qRT-PCR analysis of MAF and its corresponding lncRNA p12406. (B) qRT-PCR analysis of MAB21L2 and its corresponding lncRNAs including lncRNA p13450 and lncRNA p36527\_v4. (C) qRT-PCR analysis of BMP7 and its corresponding lncRNAs including lncRNA p8266 and lncRNA p33604. (D) qRT-PCR analysis of CDH2 and its corresponding lncRNA p38896\_v4. (E) qRT-PCR analysis of MEIS1 and its corresponding lncRNA p35882\_v4. The bar represents mean  $\pm$  SEM (n=3 independent experiments). a =  $p < 0.01$  vs D0; A =  $p < 0.05$  vs D0; b =  $p < 0.01$  vs D7; B =  $p < 0.05$  vs D7; c =  $p < 0.01$  vs D14; C =  $p < 0.05$  vs D14.

**Figure. S5 Example for algorithm of LC3B fluorescence.**

(A) The original image of LC3B staining. (B) The transformed image



after turning into 8-bit type and inverted by Image J software. (C) The calculated image after adjusting its threshold to manifest the LC3B dots.

Scar bars: 25  $\mu\text{m}$  (630X).

**Table S1. Differentially expressed autophagy related genes in LBs versus UiPSCs**

| <b>mRNA</b> | <b>FC (abs) in microarray</b> | <b>FC (abs) in qRT-PCR</b> | <b>Regulation</b> |
|-------------|-------------------------------|----------------------------|-------------------|
| SH3GLB1     | 3.96                          | 2.78                       | up                |
| WIP1        | 3.4                           | 9.81                       | up                |
| MAP1LC3B    | 2.33                          | 1.71                       | up                |
| VAMP7       | 2.33                          | 1.84                       | up                |
| VMP1        | 2.45                          | 1.87                       | up                |
| BNIP3L      | 4.18                          | 5.71                       | up                |
| PTEN        | 1.86                          | 2.06                       | up                |
| ATG5        | 1.4                           | 1.81                       | up                |
| PINK1       | 1.97                          | 4.18                       | up                |

“up” means the expression of mRNA is higher in LBs both in microarray and qRT-PCR analysis.

**Table S2. Differentially expressed lens development related lncRNA and their correlated genes in LBs versus UiPSCs**

| <b>LncRNA ProbeName</b> | <b>LncRNA ID</b>  | <b>Database</b>     | <b>FC (abs) in microarray</b> | <b>FC (abs) in qRT-PCR</b> | <b>Regulation</b> | <b>Correlated mRNA</b> |
|-------------------------|-------------------|---------------------|-------------------------------|----------------------------|-------------------|------------------------|
| p12406                  | ENST00000513690.1 | ENSEMBL             | 2.31                          | 149.01                     | up                | MAF                    |
| p36527_v4               | ENST00000509463.1 | ENSEMBL             | 5.05                          | 171.24                     | up                | MAB21L2                |
| p13450                  | ENST00000517660.1 | ENSEMBL             | 4.99                          | 7.44                       | up                |                        |
| p33604                  | ENST00000523759.1 | ENSEMBL             | 4.4                           | 3.76                       | up                | BMP7                   |
| p8266                   | ENST00000567877.1 | ENSEMBL             | 6.62                          | 10.56                      | down              |                        |
| p38896_v4               | ENST00000571328.1 | ENSEMBL             | 2.41                          | 1.15                       | up                | CDH2                   |
| p35822_v4               | TCONS_00025230    | HumanLincRNACatalog | 5.64                          | 8.15                       | up                | MEIS1                  |
| p34737_v4               | ENST00000444301.1 | ENSEMBL             | 2.11                          | 1.02                       | up/—              | CTNNB1                 |

“down” means the expression of lncRNA is lower in LBs both in microarray and qRT-PCR analysis. “up” means the expression of lncRNA is higher in LBs both in microarray and qRT-PCR analysis. “up/—” means the expression of lncRNA is higher in LBs in microarray analysis but shows no difference in qRT-PCR analysis.

**Table S3. Differentially expressed lens development related genes in LBs versus UiPSCs**

| <b>mRNA</b> | <b>FC (abs) in microarray</b> | <b>FC (abs) in qRT-PCR</b> | <b>Regulation</b> |
|-------------|-------------------------------|----------------------------|-------------------|
| MAF         | 4.24                          | 6.38                       | up                |
| MAB21L2     | 4.97                          | 50.46                      | up                |
| BMP7        | 4.68                          | 5.03                       | up                |
| CDH2        | 4.89                          | 6.78                       | up                |
| MEIS1       | 12.18                         | 694.94                     | up                |
| CTNNB1      | 2.1                           | 0.99                       | up/—              |

“up” means the expression of mRNA is higher in LBs both in microarray and qRT-PCR analysis. “up/—” means the expression of mRNA is higher in LBs in microarray analysis but shows no difference in qRT-PCR analysis.

**Table S4. Primer sequences used in qRT-PCR**

| <b>Gene</b> | <b>Direction</b> | <b>Primer sequence 5'→3'</b> |
|-------------|------------------|------------------------------|
| SH3GLB1     | Forward          | ATTACCAGACTTCTGCTAGAGGG      |
|             | Reverse          | GGATGGAAAACCTCCCAGTTGTT      |
| WIP1        | Forward          | AGTCAGTCACACAAAACCACG        |
|             | Reverse          | AGAGCACATAGACCTGTTGGG        |
| MAP1LC3B    | Forward          | AAGGCGCTTACAGCTCAATG         |
|             | Reverse          | CTGGGAGGCATAGACCATGT         |
| VAMP7       | Forward          | GAGGTTCCAGACTACTTACGGT       |
|             | Reverse          | GACACTTGAGAACTCGCTATTCA      |
| VMP1        | Forward          | GACCAGAGACGTGTAGCAATG        |
|             | Reverse          | ACAATGCTTTGACGATGCCATAA      |
| BNIP3L      | Forward          | TTGGATGCACAACATGAATCAGG      |
|             | Reverse          | TCTTCTGACTGAGAGCTATGGTC      |
| PTEN        | Forward          | TTTGAAGACCATAACCCACCAC       |
|             | Reverse          | ATTACACCAGTTCGTCCCTTTC       |
| ATG5        | Forward          | AAAGATGTGCTTCGAGATGTGT       |
|             | Reverse          | CACTTTGTCAGTTACCAACGTCA      |
| PINK1       | Forward          | GCCTCATCGAGGAAAAACAGG        |
|             | Reverse          | GTCTCGTGTCCAACGGGTC          |
| MAF         | Forward          | AGTCCTGCCGCTTCAAGAG          |
|             | Reverse          | CCGCTGCTCACCAACTTCT          |
| MAB21L2     | Forward          | GTCTCTCTGGGTTCGAGTTCAT       |
|             | Reverse          | CACATCCCGATAGCTGCACTT        |
| BMP7        | Forward          | TCAACCTCGTGGAACATGACA        |
|             | Reverse          | CTTGGAAGATCAAACCGGAACT       |
| CDH2        | Forward          | AGCCAACCTTAACTGAGGAGT        |
|             | Reverse          | GGCAACTTGATTGGAGGGATG        |
| MEIS1       | Forward          | TACCCGCACACAGCTCATAC         |
|             | Reverse          | CATTGAATGACTCTGACGAGCA       |
| CTNNB1      | Forward          | CATCTACACAGTTTGATGCTGCT      |
|             | Reverse          | GCAGTTTTGTCAGTTCAGGGA        |
| Beclin1     | Forward          | GGTGTCTCTCGCAGATTCATC        |
|             | Reverse          | TCAGTCTTCGGCTGAGGTTCT        |
| UVRAG       | Forward          | ATGCCAGACCGTCTTGATACA        |
|             | Reverse          | TGACCCAAGTATTTCAGCCCA        |
| SQSTM       | Forward          | GCACCCCAATGTGATCTGC          |
|             | Reverse          | CGCTACACAAGTCGTAGTCTGG       |
| ATG12       | Forward          | TAGAGCGAACACGAACCATCC        |

|                  |         |                          |
|------------------|---------|--------------------------|
| ATG4A            | Reverse | CACTGCCAAAACACTCATAGAGA  |
|                  | Forward | TGCTGGTTGGGGATGTATGC     |
| ATG13            | Reverse | GCGTTGGTATTCTTTGGGTTGT   |
|                  | Forward | AGACAGTTCGTGTTGGGACAG    |
| LncRNA p4790     | Reverse | CTCAAATTGCCTGGTAGACATGA  |
|                  | Forward | AGAGCCACCTACGACCTCA      |
| LncRNA p13116    | Reverse | CTCCATCTCCTTGTCTTCTCCT   |
|                  | Forward | GCCTGTTTGGTGGTCTCTTC     |
| LncRNA p38664_v4 | Reverse | CTGTTCTGTGTTAGTTTGCTGA   |
|                  | Forward | TCAATAGTCAAGGAGGACAAAGAC |
| LncRNA p19101    | Reverse | TTCGGTGATGCTGTAGATGG     |
|                  | Forward | GCACTCAAGACCCTCTACGG     |
| LncRNA p13515    | Reverse | GCCATCCCTGTTCACTCCT      |
|                  | Forward | CTGCTCTTTGCTCCGTGAAA     |
| LncRNA p34310_v4 | Reverse | GGCTGTGAGGTGTAGAAGTCT    |
|                  | Forward | ATGAATCTCGCTGTGTTGTC     |
| LncRNA ALB       | Reverse | GGTATTAGGTGTCCAAGAAGAA   |
|                  | Forward | TGGGAGAGGAGAAGAGATGC     |
| LncRNA p35822_v4 | Reverse | CTGTAGGTTGCTGGTGGTCA     |
|                  | Forward | GCTGCGAGAGAATCTTGTTTC    |
| LncRNA p13839    | Reverse | AAACTTCACCGTGTTGATGA     |
|                  | Forward | GACAGCAACATTCCTTCAG      |
| LncRNA p36469_v4 | Reverse | TACCTTCACAGCCTCCAA       |
|                  | Forward | TCTTGCCTCTGCCTCCTGAGT    |
| LncRNA p12406    | Reverse | CCTGTGGTTGCCTCTGTGCTTA   |
|                  | Forward | CCACCTCGGTTCCACTCAAC     |
| LncRNA p36527-V4 | Reverse | TCTCACAAGGCTGTCAACTTCA   |
|                  | Forward | CGCTTCGGGATGAAATGACCAG   |
| LncRNA p13450    | Reverse | GCTGCTTCTGCCTCTGTCTTCT   |
|                  | Forward | TCCTGCCTGTCCTTCTACTCA    |
| LncRNA p33604    | Reverse | GCTCTTATCTTGCTGCTGATGG   |
|                  | Forward | TTCCTGGTTCTGGCTGGCATC    |
| LncRNA p8266     | Reverse | TGGATTCCCTGAGGTCGCACTG   |
|                  | Forward | TCCTGCCACCTCAACCTCACA    |
| LncRNA p38896-v4 | Reverse | TCCACCATCATTGCTGCCTCTG   |
|                  | Forward | ACCGCCAGACTATGATGAGAG    |
| LncRNA p34737-v4 | Reverse | GGGAAGGAGAGATGGAGTTAT    |
|                  | Forward | CCAGCAGACCACGCTCATTACT   |
|                  | Reverse | GGCAGCACAGCAGTCACCTT     |

---
